# Supplementary figures and images for: Research on the mechanism by which USP18 promotes colorectal cancer progression through stabilizing KRT16 expression
Source: Research Square preprint supplement (doi:10.21203/rs.3.rs-8191897/v1), 2025-12-08

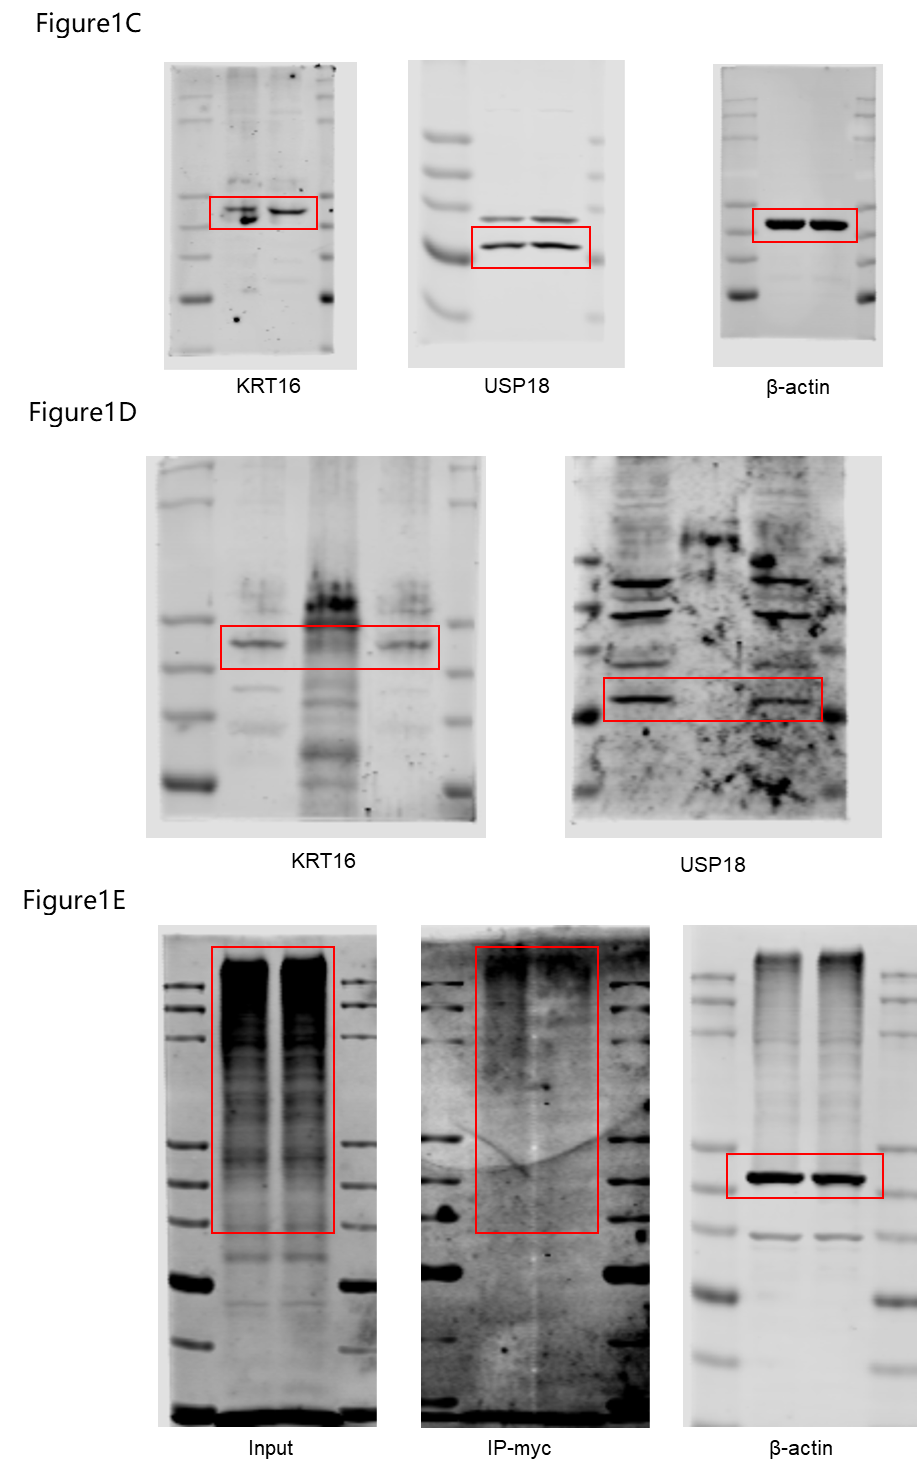


**
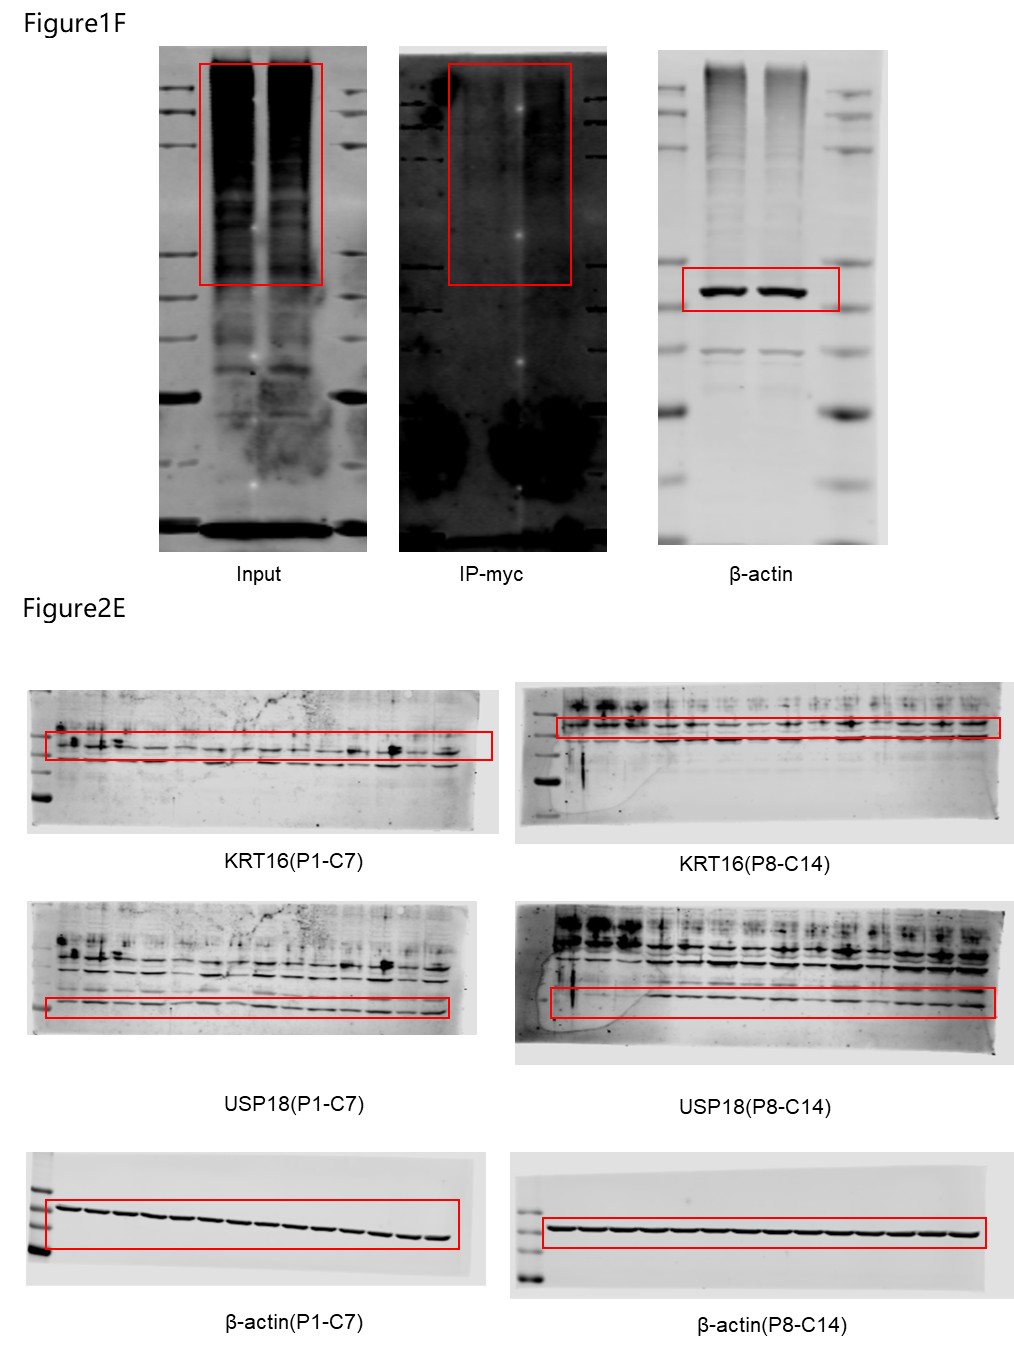
**


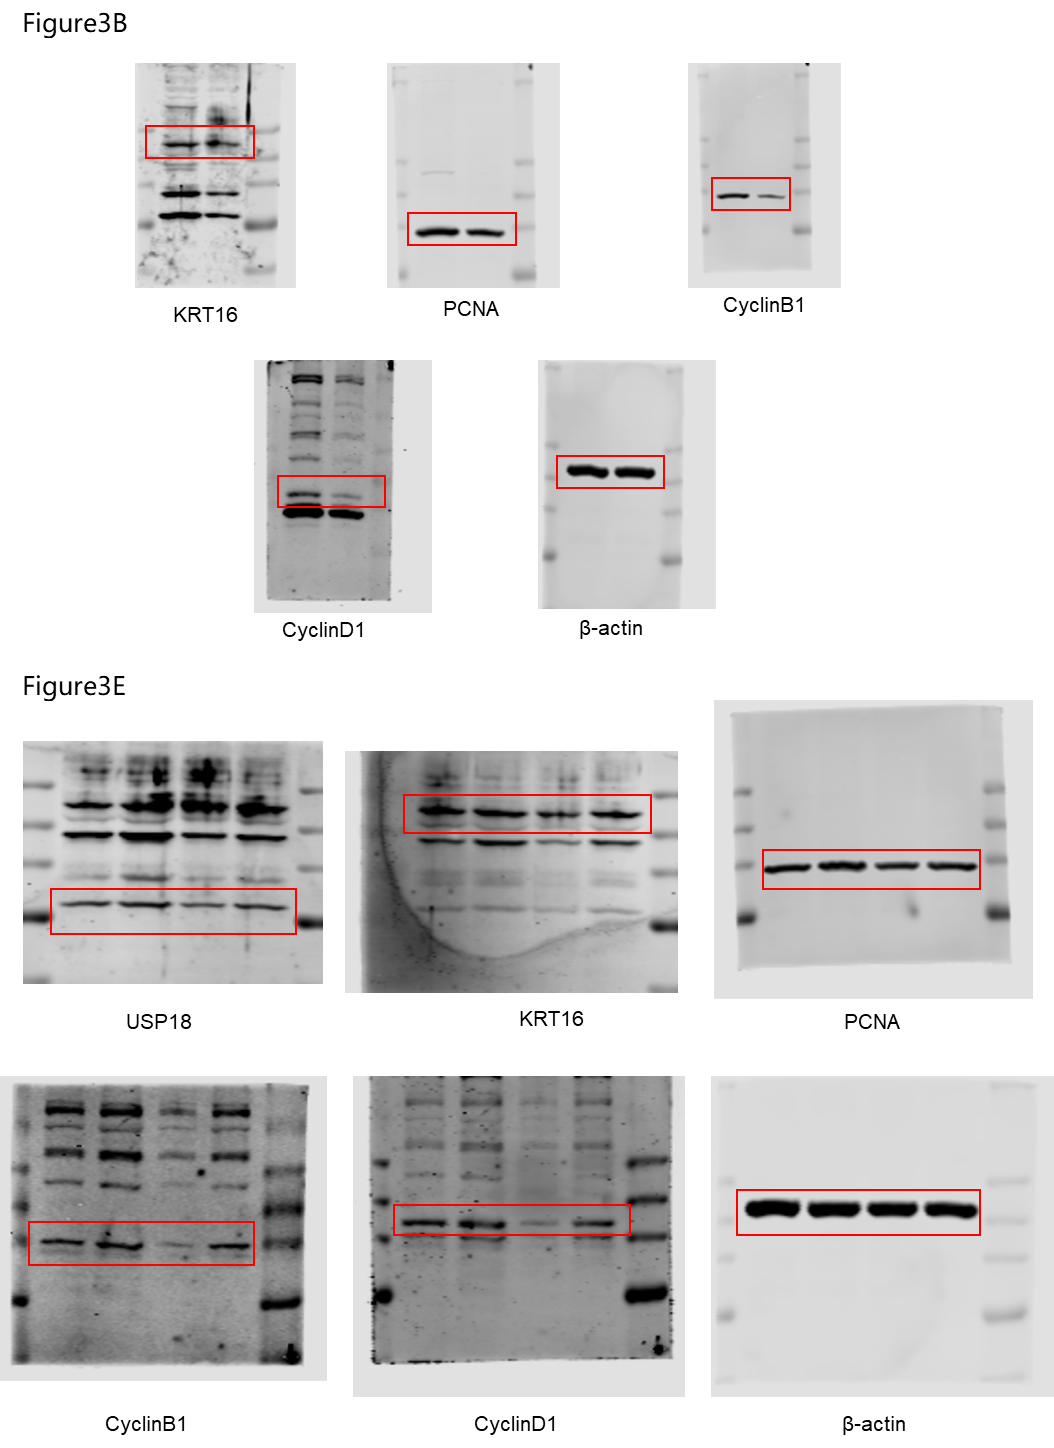

Supplement: Supplementary file 1 [file 4529a0eadc402db877a09dd8.docx]
